# Supplementary material
Source: PubMed Central journal article supplement (PMC3807729)
Supplement: NIHMS54761-supplement-Table_S1.pdf [file NIHMS54761-supplement-Table_S1.pdf]

| <b>Sample</b>           | <b>Primary antibody</b> | <b>Secondary antibody</b> |
|-------------------------|-------------------------|---------------------------|
| MukB-mYpet              | MukB (30)               | Anti-rabbit               |
| MukB-mCherry            | MukB (30)               | Anti-rabbit               |
| MukB <sub>EQ</sub> -GFP | MukB (30)               | Anti-rabbit               |
| MukB <sub>DA</sub> -GFP | MukB (30)               | Anti-rabbit               |
| MukE-mYPet              | Anti-GFP                | Anti-rabbit               |
| MukF-mYPet              | Anti-GFP                | Anti-rabbit               |

**Table S1.** List of primary and secondary antibodies used for western probes.
