# Supplementary material
Source: PubMed Central journal article supplement (PMC3807729)
Supplement: NIHMS54761-supplement-Table_S2.pdf [file NIHMS54761-supplement-Table_S2.pdf]

|              |                                                    |            |
|--------------|----------------------------------------------------|------------|
| <b>Ab16</b>  | <i>mukB-YPet, Km<sup>R</sup></i>                   | This study |
| <b>Ab18</b>  | <i>mukE-YPet Km<sup>R</sup></i>                    | This study |
| <b>Ab25</b>  | <i>mukB-mCherry frt, mukE-YPet, Km<sup>R</sup></i> | This study |
| <b>Ab24</b>  | <i>mukB-mCherry, Km<sup>R</sup></i>                | This study |
| <b>Ab36</b>  | <i>mukE-YPet frt</i>                               | This study |
| <b>Ab45</b>  | <i>mukB-GFP, Cm<sup>R</sup></i>                    | This study |
| <b>Ab60</b>  | <i>frt YPet-mukF</i>                               | This study |
| <b>Ab75</b>  | <i>mukB-E1407Q-GFP, Cm<sup>R</sup></i>             | This study |
| <b>Ab81</b>  | <i>Ab60, mukBmCherry, , Cm<sup>R</sup></i>         | This study |
| <b>Ab88</b>  | <i>mukE-mCherry frt</i>                            | This study |
| <b>Ab137</b> | <i>Ab88, Ab75</i>                                  | This study |
| <b>Ab191</b> | <i>frt N-mCherry-mukF</i>                          | This study |
| <b>Ab198</b> | <i>mukB-E1407Q-YPet, Km<sup>R</sup></i>            | This study |
| <b>Ab213</b> | <i>mukB-E1407Q, Km<sup>R</sup>, Ab60</i>           | This study |
| <b>Ab220</b> | <i>mukB-GFP, Cm<sup>R</sup>, Ab88</i>              | This study |
| <b>Ab221</b> | <i>mukB-GFP, Cm<sup>R</sup>, Ab191</i>             | This study |
| <b>Ab223</b> | <i>mukB-E1407Q, Km<sup>R</sup>, MukE-YPet frt</i>  | This study |
| <b>Ab237</b> | <i>mukE-PAmCherry, Km<sup>R</sup></i>              | This study |
| <b>Ab238</b> | <i>mukB-PAmCherry, Km<sup>R</sup></i>              | This study |
| <b>Ab246</b> | <i>mukB-D1406A-mYPet, Km<sup>R</sup></i>           | This study |
| <b>Ab247</b> | <i>mukB-D1406A Km<sup>R</sup>, MukF-YPet frt</i>   | This study |
| <b>Ab248</b> | <i>mukB-D1406A, Km<sup>R</sup>, MukE-YPet frt</i>  | This study |
| <b>RRL80</b> | <i>mukB-D1406A-GFP, Cm<sup>R</sup></i>             | This study |
| <b>Kat1</b>  | <i>mukB-GFP, Cm<sup>R</sup></i>                    | Ref. (31)  |

**Table S2.** List of strains and their sources used in current study.
