# Supplementary material
Source: PubMed Central journal article supplement (PMC3807729)
Supplement: NIHMS54761-supplement-Table_S5.pdf [file NIHMS54761-supplement-Table_S5.pdf]

| <b>Strain</b>                | <b>Mean total number of molecules in all localized spots per cell <math>\pm</math>SEM, <math>N</math>=number of cells in dataset</b> | <b>Total number of molecules not in localized spot per cell (Mode from Gamma fit <math>\pm</math> HWHM)</b> | <b>Proportion of molecules in localized spots relative to number in whole cell (%)</b> | <b>Total number of molecules per cell</b> |
|------------------------------|--------------------------------------------------------------------------------------------------------------------------------------|-------------------------------------------------------------------------------------------------------------|----------------------------------------------------------------------------------------|-------------------------------------------|
| <b>MukB</b>                  | 82 $\pm$ 7,<br>$N$ =96                                                                                                               | 356 $\pm$ 177                                                                                               | 19 $\pm$ 10                                                                            | 438 $\pm$ 180                             |
| <b>MukE</b>                  | 79 $\pm$ 3,<br>$N$ =82                                                                                                               | 301 $\pm$ 150                                                                                               | 21 $\pm$ 11                                                                            | 380 $\pm$ 154                             |
| <b>MukF</b>                  | 45 $\pm$ 2s,<br>$N$ =105                                                                                                             | 211 $\pm$ 109                                                                                               | 18 $\pm$ 10                                                                            | 256 $\pm$ 110                             |
| <b>MukB<sub>EQ</sub></b>     | 65 $\pm$ 6,<br>$N$ =55                                                                                                               | 278 $\pm$ 139                                                                                               | 20 $\pm$ 9                                                                             | 333 $\pm$ 139                             |
| <b>MukB<sub>EQ</sub>MukE</b> | 65 $\pm$ 5,<br>$N$ =75                                                                                                               | 331 $\pm$ 166                                                                                               | 16 $\pm$ 8                                                                             | 396 $\pm$ 166                             |
| <b>MukB<sub>EQ</sub>MukF</b> | 24 $\pm$ 4,<br>$N$ =64                                                                                                               | 170 $\pm$ 85                                                                                                | 11 $\pm$ 5                                                                             | 214 $\pm$ 88                              |

**Table S5.** Distribution of total numbers of MukBEF molecules in YPet in both the fluorescent spots and not integrated into localized spots.
