# Supplementary material
Source: PubMed Central journal article supplement (PMC3807729)

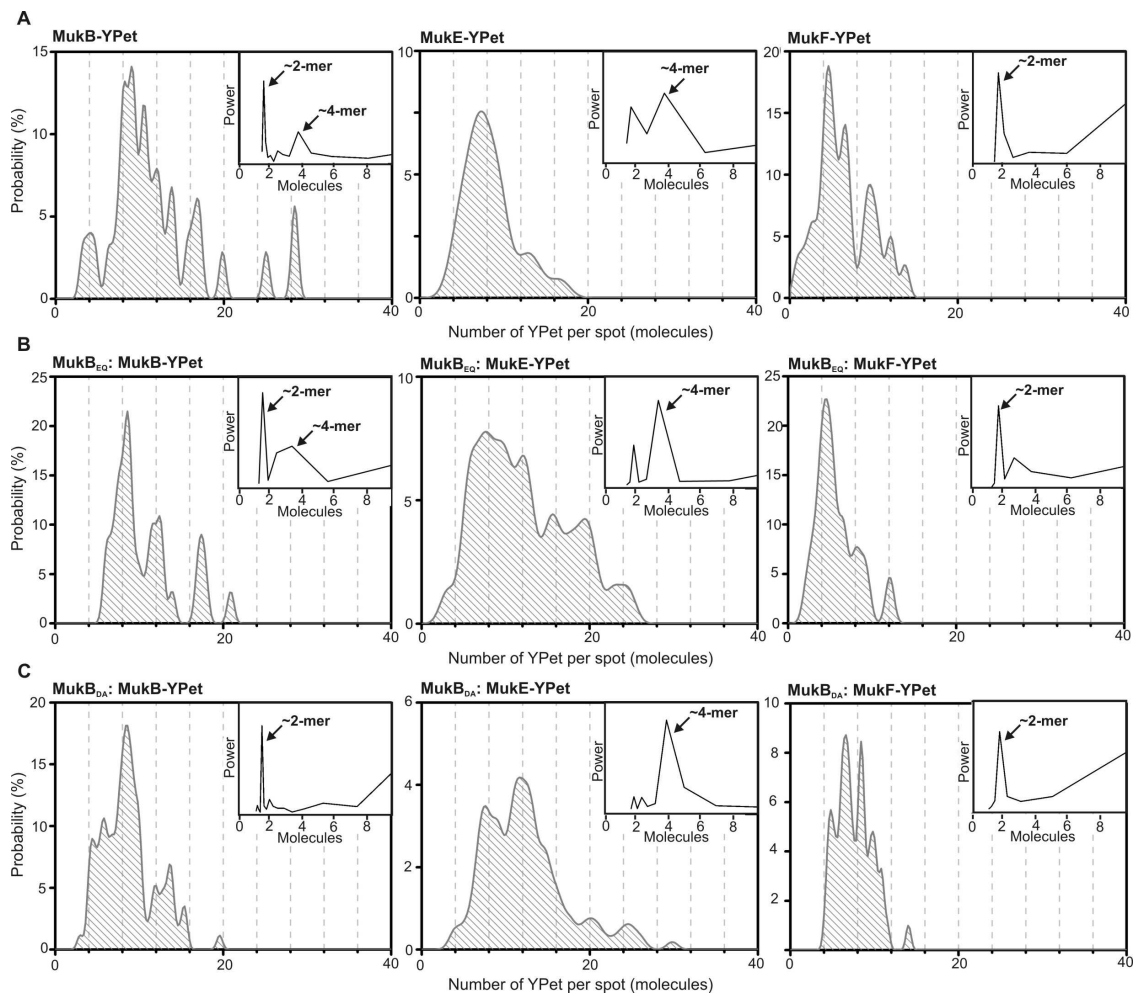

Supplement: NIHMS54761-supplement-Fig_S12.pdf [file NIHMS54761-supplement-Fig_S12.pdf]

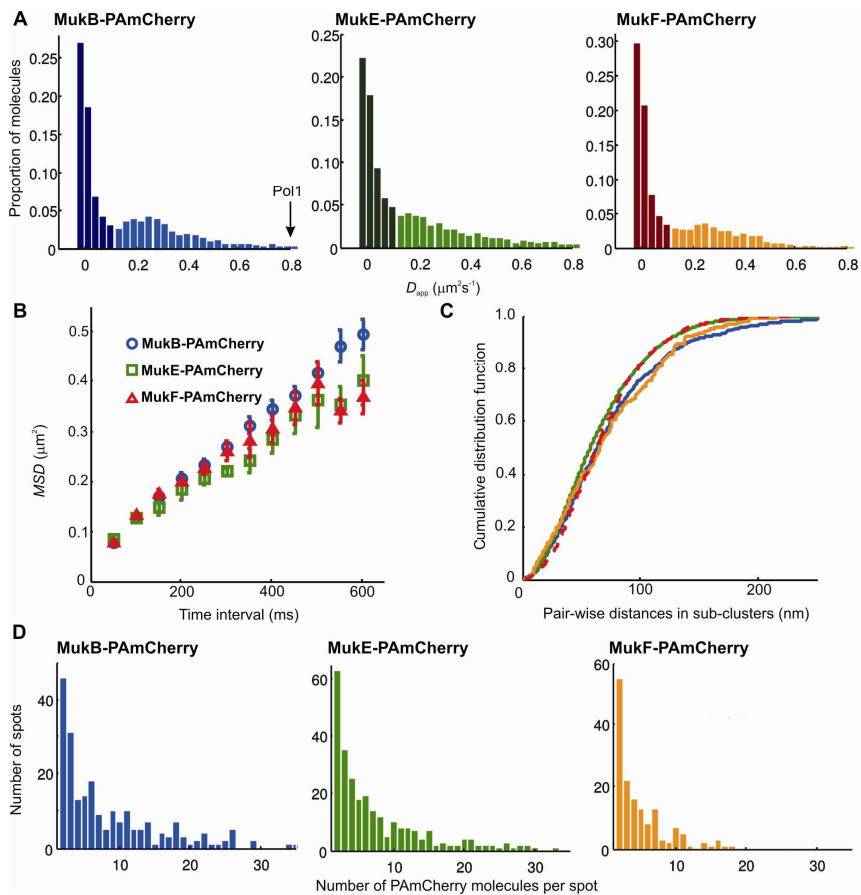

Supplement: NIHMS54761-supplement-Fig_S5.pdf [file NIHMS54761-supplement-Fig_S5.pdf]

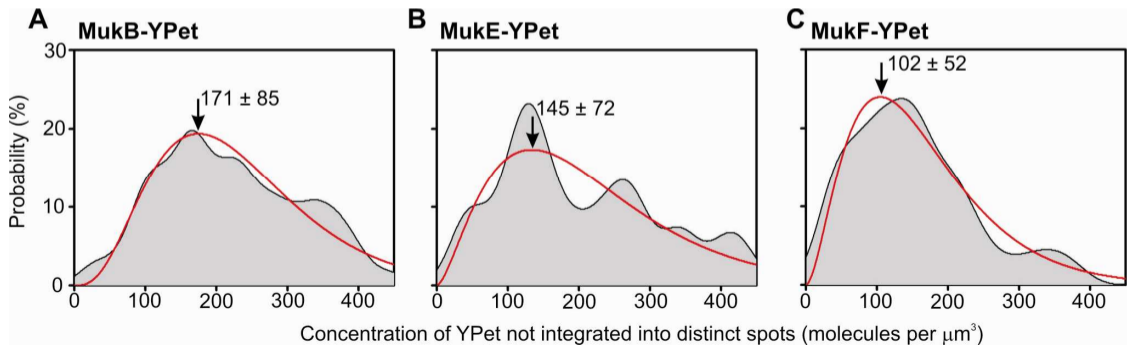

Supplement: NIHMS54761-supplement-Fig_S6.pdf [file NIHMS54761-supplement-Fig_S6.pdf]

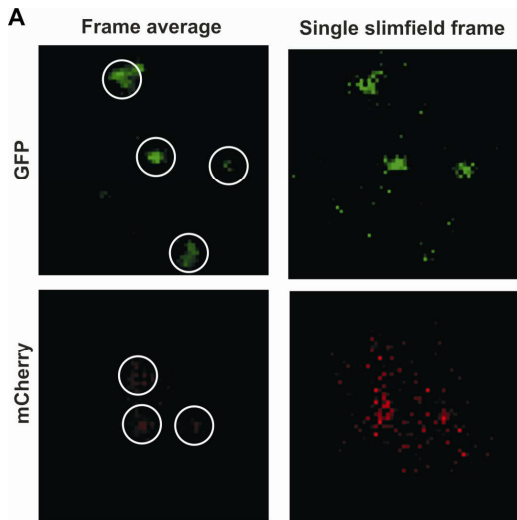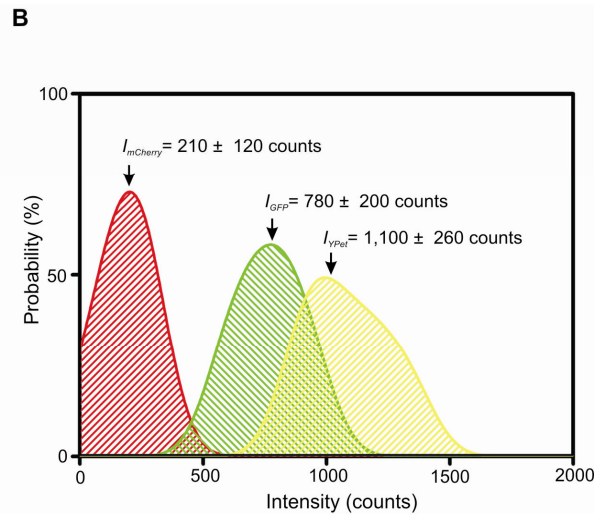

Supplement: NIHMS54761-supplement-Fig_S7.pdf [file NIHMS54761-supplement-Fig_S7.pdf]

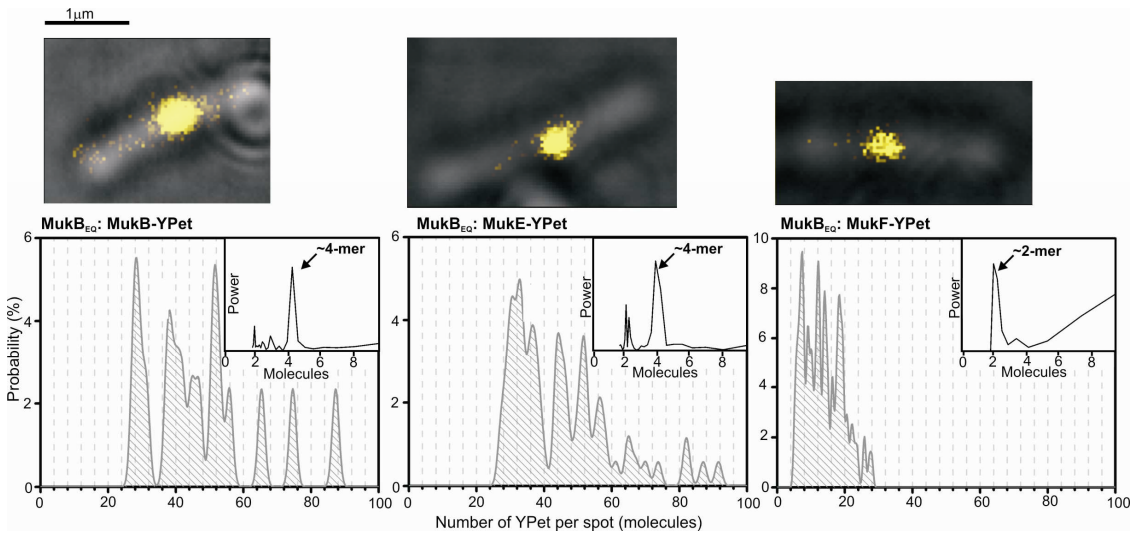

Supplement: NIHMS54761-supplement-Fig_S9.pdf [file NIHMS54761-supplement-Fig_S9.pdf]
